# Supplementary material for: Comparison of the Active Compositions between Raw and Processed Epimedium from Different Species
Source: MDPI journal article supplement (doi:10.3390/molecules23071656), 2018-07-07
Supplement: s1 [file s1]

Article

# Supplementary Materials: Comparison of the Active Compositions between Raw and Processed *Epimedium* from Different Species

Huamei Zhang <sup>1</sup>, Hui Wang <sup>1</sup>, Juan Wei, Xiaopeng Chen, Mengjie Sun, Huizi Ouyang, Jia Hao, Yanxu Chang, Zhiying Dou and Jun He \*

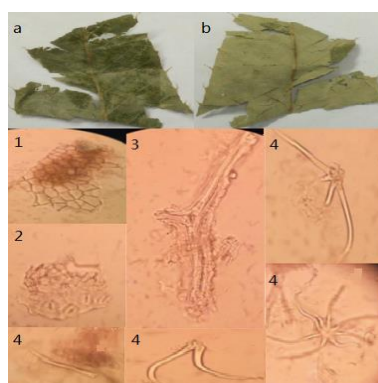

**Figure S1.** The appearance and microscopic features of *Epimedium* in batch 1 samples: (a) leaf upper surface; (b) leaf lower surface; (1) stem epidermis; (2) leaf lower epidermis; (3) fibers; (4) non-glandular hairs.

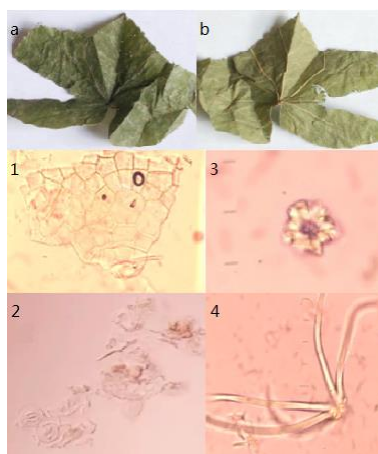

**Figure S2.** The appearance and microscopic features of *Epimedium* in batch 2 samples: (a) leaf upper surface; (b) leaf lower surface; (1) leaf upper epidermis; (2) leaf lower epidermis; (3) fibers; (4) non-glandular hairs.

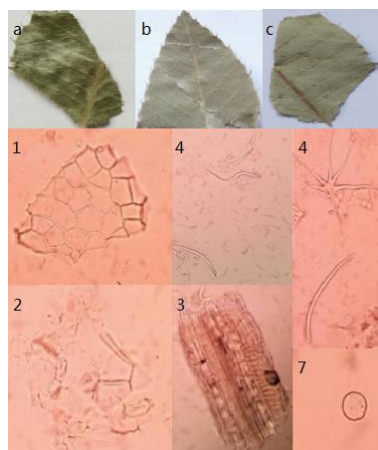

**Figure S3.** The appearance and microscopic features of *Epimedium* in batch 3 samples: (a) leaf upper surface; (b) tip of the leaves; (c) leaf lower surface; (1) stem epidermis; (2) leaf lower epidermis; (3) fibers; (4) non-glandular hairs; (7) oil cells.

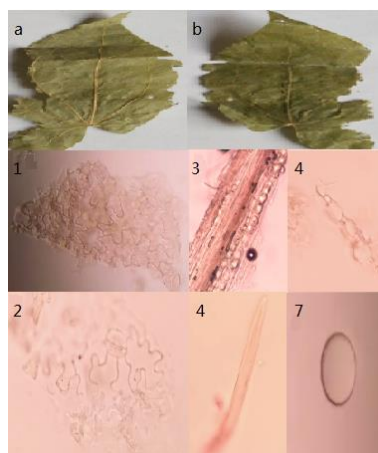

**Figure S4.** The appearance and microscopic features of *Epimedium* in batch 4 samples: (a) leaf upper surface; (b) leaf lower surface; (1) leaf upper epidermis; (2) leaf lower epidermis; (3) fibers; (4) non-glandular hairs; (7) oil cells.

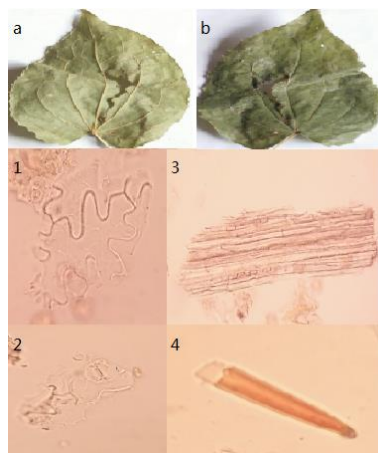

**Figure S5.** The appearance and microscopic features of *Epimedium* in batch 5 samples: (a) leaf upper surface; (b) leaf lower surface; (1) leaf upper epidermis; (2) leaf lower epidermis; (3) fibers; (4) non-glandular hairs.

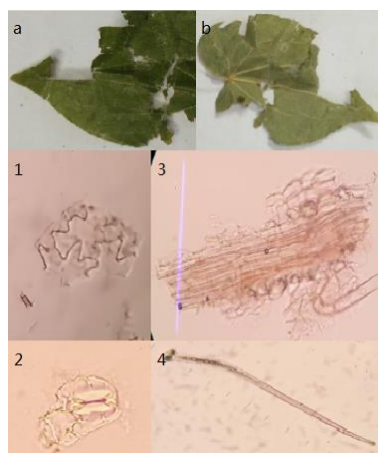

**Figure S6.** The appearance and microscopic features of *Epimedium* in batch 6 samples: (a) leaf upper surface; (b) leaf lower surface; (1) leaf upper epidermis; (2) leaf lower epidermis; (3) fibers; (4) non-glandular hairs.

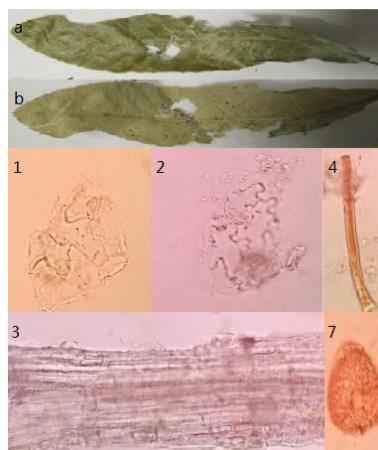

**Figure S7.** The appearance and microscopic features of *Epimedium* in batch 7 samples: (a) leaf upper surface; (b) leaf lower surface; (1) leaf upper epidermis; (2) leaf lower epidermis; (3) fibers; (4) non-glandular hairs; (7) oil cells.

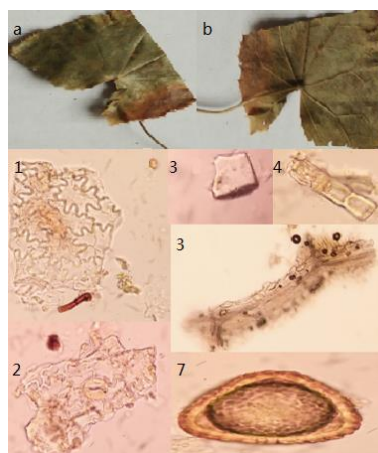

**Figure S8.** The appearance and microscopic features of *Epimedium* in batch 8 samples: (a) leaf upper surface; (b) leaf lower surface; (1) leaf upper epidermis; (2) leaf lower epidermis; (3) fibers; (4) non-glandular hairs; (7) oil cells.

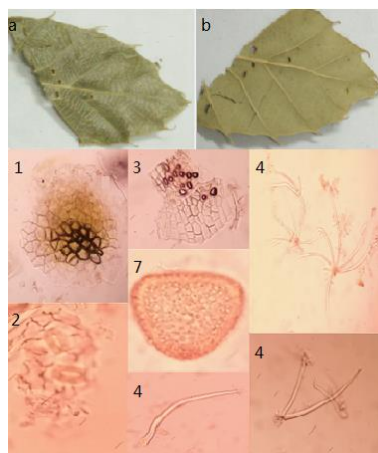

**Figure S9.** The appearance and microscopic features of *Epimedium* in batch 9 samples: (a) leaf upper surface; (b) leaf lower surface; (1) leaf upper epidermis; (2) leaf lower epidermis; (3) fibers; (4) non-glandular hairs; (7) oil cells.

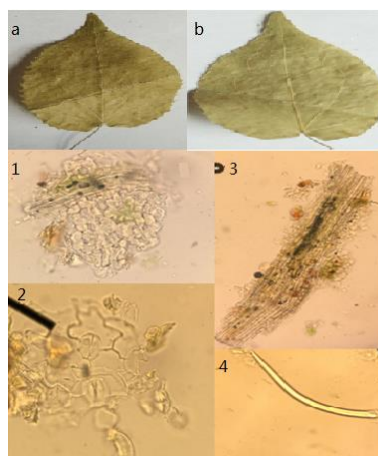

**Figure S10.** The appearance and microscopic features of *Epimedium* in batch 10 samples: (a) leaf upper surface; (b) leaf lower surface; (1) leaf upper epidermis; (2) leaf lower epidermis; (3) fibers; (4) non-glandular hairs.

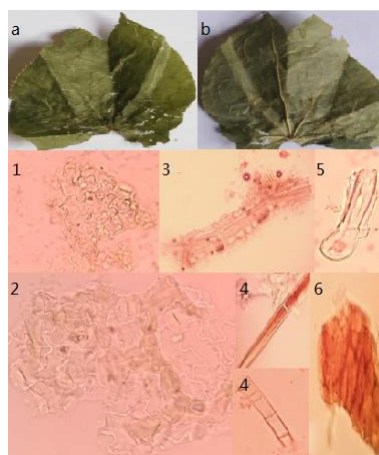

**Figure S11.** The appearance and microscopic features of *Epimedium* in batch 11 samples: (a) leaf upper surface; (b) leaf lower surface; (1) leaf upper epidermis; (2) leaf lower epidermis; (3) fibers; (4) non-glandular hairs; (5) glandular hairs; (6) reddish-brown content.

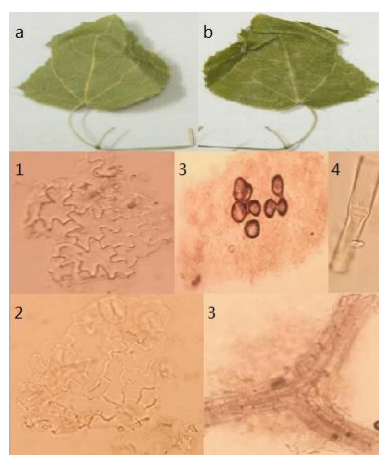

**Figure S12.** The appearance and microscopic features of *Epimedium* in batch 12 samples: (a) leaf upper surface; (b) leaf lower surface; (1) leaf upper epidermis; (2) leaf lower epidermis; (3) fibers; (4) non-glandular hairs.

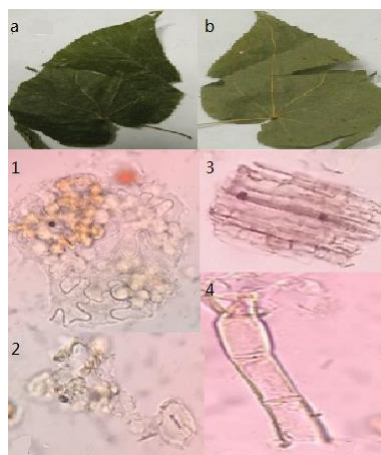

**Figure S13.** The appearance and microscopic features of *Epimedium* in batch 13 samples: (a) leaf upper surface; (b) leaf lower surface; (1) leaf upper epidermis; (2) leaf lower epidermis; (3) fibers; (4) non-glandular hairs.
